# Supplementary material for: Flavor Characterization of Native Xinjiang Flat Peaches Based on Constructing Aroma Fingerprinting and Stoichiometry Analysis
Source: MDPI journal article supplement (doi:10.3390/foods12132554), 2023-06-29
Supplement: s1 [file s1]

Supplementary file for:

**Flavor characterization of native Xinjiang flat peaches based on constructing aroma fingerprinting and stoichiometry analysis**

Chunyan Li, Youyou Xu, Huimin Wu, Ruiui Zhao, Xinwei Wang, FangFang Wang, Qingquan Fu, Tiantian Tang, Xuewie Shi, Bin Wang \*

Food college, Shihezi University, Shihezi 832000, Xinjiang, People' s Republic of China (PRC).

\*Correspondence: B. W.: binwang0228@shzu.edu.cn Tel: 86-0993-2058093

## Contents

|                                                                                                                                     |    |
|-------------------------------------------------------------------------------------------------------------------------------------|----|
| Supplementary Tables .....                                                                                                          | 3  |
| Table S1. Fruit fresh weight, moisture content, diameter and firmness of flat peach in Xinjiang at commercially mature stages. .... | 3  |
| Table S2. Fundamental physicochemical data of flat peach in Xinjiang.....                                                           | 3  |
| Table S3. Concentration of volatile compounds of flat peach in Xinjiang ( $\mu\text{g}/\text{kg}$ ).....                            | 3  |
| Table S4. Tentative identifications of volatile compounds of flat peach in Xinjiang ( $\mu\text{g}/\text{kg}$ ). ....               | 4  |
| Table S5. Concentration of main aroma compounds of flat peaches, nectarine, apricot and grape ( $\mu\text{g}/\text{kg}$ ).....      | 7  |
| Supplementary Figures .....                                                                                                         | 8  |
| Figure S1. The concentration of soluble sugars and organic acids of flat peach in Xinjiang.....                                     | 8  |
| Figure S2. The concentration of phenolic compounds of flat peach in Xinjiang. ....                                                  | 8  |
| Figure S3. Importance of variables between phenolic compounds and antioxidant activity of flat peach in Xinjiang.....               | 9  |
| Figure S4. The loading diagram of PCA of volatile compounds of flat peach in Xinjiang.....                                          | 10 |
| Figure S5. Overlay of the common ion chromatograms in the HS-SPME-GC-MS analysis of flat peaches and nectarines. ....               | 11 |
| Figure S6. Odor characteristics of main aroma substances of flat peach in Xinjiang. 12                                              |    |

## Supplementary Tables

**Table S1. Fruit fresh weight, moisture content, diameter and firmness of flat peach in Xinjiang at commercially mature stages.**

| Variety | Fresh weight<br>(g) | Moisture<br>content<br>(%) | Transverse<br>diameter<br>(mm) | Longitudinal<br>diameter<br>(mm) | Firmness<br>(N) |
|---------|---------------------|----------------------------|--------------------------------|----------------------------------|-----------------|
| QP      | 126.99±8.03b        | 85.44±0.41b                | 77.27±3.68b                    | 71.79±3.04b                      | 12.72±1.03a     |
| R2      | 105.32±5.08c        | 82.78±0.13c                | 68.47±1.01c                    | 66.63±1.22c                      | 9.05±0.64c      |
| R4      | 105.91±5.82c        | 86.59±0.36a                | 70.96±2.39c                    | 66.97±3.41c                      | 12.43±0.32a     |
| WP      | 193.08±10.16a       | 85.51±0.37b                | 86.17±2.59a                    | 74.64±2.72a                      | 11.96±1.04b     |

Each value was the mean ± standard deviation. Significant variations are shown with different letters for each sample at a level of  $p \leq 0.05$ .

**Table S2. Fundamental physicochemical data of flat peach in Xinjiang.**

| Variety | Soluble Solid<br>Content<br>(%) | Titration<br>Acidity<br>(%) | Total Flavonoid<br>Content<br>mg RE/100g | Total Phenol<br>Content<br>mg GAE/100g | SSC/TA<br>Ratio |
|---------|---------------------------------|-----------------------------|------------------------------------------|----------------------------------------|-----------------|
| QP      | 9.90±0.26c                      | 0.43±0.01c                  | 64.98±7.90b                              | 55.36±1.55b                            | 22.98±0.66a     |
| R2      | 15.37±0.31a                     | 0.90±0.03a                  | 75.51±2.19b                              | 64.71±3.11b                            | 17.04±0.64b     |
| R4      | 12.43±0.15b                     | 0.64±0.06b                  | 289.02±9.27a                             | 182.80±8.79a                           | 19.46±2.00b     |
| WP      | 15.67±0.31a                     | 0.70±0.03b                  | 11.30±0.80c                              | 15.07±1.14c                            | 22.36±0.82a     |

Each value was the mean ± standard deviation. Significant variations are shown with different letters for each sample at a level of  $p \leq 0.05$ .

**Table S3. Concentration of volatile compounds of flat peach in Xinjiang (µg/kg).**

| Variety | Alcohols | Acids | Aldehydes | Ketones | Esters | Lactones | Terpenes | Others |
|---------|----------|-------|-----------|---------|--------|----------|----------|--------|
| QP      | 27.85    | 6.87  | 2412.30   | 13.65   | 142.00 | 39.36    | 95.11    | 8.84   |
| R2      | 19.96    | 6.82  | 988.50    | 13.18   | 112.27 | 50.55    | 4.30     | 10.00  |
| R4      | 3.85     | 6.34  | 3132.39   | 6.70    | 125.28 | 66.95    | n. d.    | 19.75  |
| WP      | 15.66    | 3.13  | 1960.41   | 23.97   | 211.51 | 97.74    | 159.30   | 11.78  |

“n. d.” indicates that the substance was not detected in the corresponding sample. Each value was the mean  $\pm$  standard deviation. Significant variations are shown with different letters for each sample at a level of  $p \leq 0.05$ .

**Table S4. Tentative identifications of volatile compounds of flat peach in Xinjiang (µg/kg).**

| <b>Tentative I.D.</b>    | <b>RI</b> | <b>QP</b>      | <b>R2</b>     | <b>R4</b>      | <b>WP</b>      |
|--------------------------|-----------|----------------|---------------|----------------|----------------|
| <b>Alcohols</b>          |           |                |               |                |                |
| 1-Hexanol                | 1340      | 7.29±0.15b     | 6.49±0.14c    | 1.96±0.02d     | 7.91±0.22a     |
| 2-Hexen-1-ol             | 1398      | 16.61±0.43a    | 2.66±0.07c    | 1.89±0.03c     | 5.58±0.15b     |
| 1-Octanol                | 1558      | 2.82±0.16a     | 9.07±0.29a    | n. d.          | n. d.          |
| Dihydro-β-ionol          | 1976      | 1.13±0.02c     | 1.74±0.04b    | n. d.          | 2.17±0.06a     |
| <b>Acids</b>             |           |                |               |                |                |
| Acetic acid              | 1461      | 5.50±0.12b     | 4.69±0.11c    | 6.34±0.13a     | 3.13±0.08d     |
| Pentanoic acid           | 1734      | 1.37±0.04b     | 2.13±0.07a    | n. d.          | n. d.          |
| <b>Aldehydes</b>         |           |                |               |                |                |
| Hexanal                  | 1081      | 74.83±1.78b    | 130.55±3.58a  | 29.95±0.90c    | 30.85±1.00c    |
| 2-Methylpent-4-enal      | 1141      | 0.74±0.02b     | n. d.         | n. d.          | n. d.          |
| 3-Methyl hexanal         | 1156      | n. d.          | n. d.         | n. d.          | 2.21±0.06a     |
| 2-Hexenal                | 1213      | 794.00±13.92a  | 359.12±8.92c  | 371.43±9.12c   | 399.19±10.09b  |
| Octanal                  | 1298      | 1.65±0.02b     | 0.95±0.01c    | 0.75±0.01d     | 4.44±0.14a     |
| Nonanal                  | 1396      | 16.75±0.43c    | 11.59±0.24d   | 20.51±0.81b    | 21.16±0.89a    |
| 2,4-Hexadienal           | 1411      | 26.57±0.70a    | 13.32±0.33c   | 16.46±0.51b    | 12.51±0.32d    |
| 2-Octenal                | 1427      | 2.50±0.05b     | 0.77±0.01c    | 2.51±0.05b     | 3.53±0.10a     |
| 2,4-Heptadienal          | 1469      | 5.18±0.17a     | 1.01±0.04c    | 4.23±0.14b     | 4.32±0.12b     |
| Furfural                 | 1472      | n. d.          | 1.45±0.03a    | n. d.          | n. d.          |
| Decanal                  | 1510      | 9.28±0.49a     | 3.3±0.09d     | 7.11±0.19c     | 8.46±0.29b     |
| Benzaldehyde             | 1530      | 1454.10±41.47b | 464.47±18.64c | 2672.29±50.69a | 1472.84±41.38b |
| 2-Nonenal                | 1548      | 24.50±0.61a    | n. d.         | n. d.          | n. d.          |
| 2,6-Nonadienal           | 1715      | 1.14±0.05a     | n. d.         | n. d.          | n. d.          |
| Phenylacetaldehyde       | 1722      | 0.58±0.01b     | n. d.         | 5.20±0.11a     | n. d.          |
| 2,4-Decadienal           | 1766      | 1.48±0.06a     | 0.75±0.01c    | 0.73±0.01c     | 0.90±0.01b     |
| 2,5-Dimethylbenzaldehyde | 1775      | n. d.          | n. d.         | 1.22±0.04a     | n. d.          |
| 5-Hydroxymethylfurfural  | 2528      | n. d.          | 1.22±0.04a    | n. d.          | n. d.          |
| <b>Ketones</b>           |           |                |               |                |                |
| 3-Octanone               | 1251      | n. d.          | n. d.         | n. d.          | 3.31±0.08a     |
| Dihydro-β-ionone         | 1825      | 3.86±0.08c     | 11.82±0.58a   | 3.15±0.10d     | 7.35±0.25b     |
| Geranylacetone           | 1867      | 2.99±0.09a     | 1.08±0.04c    | 0.83±0.01d     | 2.34±0.03b     |
| β-ionone                 | 1954      | 1.04±0.04b     | n. d.         | n. d.          | 6.39±0.17a     |
| 6-Pentyl-2H-pyran-2-one  | 2175      | 5.76±0.11a     | 0.28±0.01d    | 2.72±0.05c     | 4.58±0.08b     |
| <b>Esters</b>            |           |                |               |                |                |
| Benzylcarbinyl caproate  | 1822      | 5.87±0.19b     | 4.91±0.12c    | 5.85±0.15b     | 9.20±0.29a     |
| Hexyl acetate            | 1269      | 21.86±0.64c    | 22.30±0.78bc  | 22.83±0.76b    | 24.35±0.88a    |
| 3-Hexenyl acetate        | 1309      | 13.51±0.43b    | 9.30±0.19b    | 8.90±0.10b     | 110.45±5.55a   |
| Vinyl hexanoate          | 1334      | n. d.          | 0.64±0.02a    | n. d.          | n. d.          |
| 2-Hexenyl acetate        | 1337      | 27.05±0.64b    | 13.35±0.21d   | 20.37±0.56c    | 28.29±0.66a    |
| Heptyl Acetate           | 1377      | 2.63±0.07a     | n. d.         | n. d.          | 0.87±0.02b     |

Table S4 Continued

|                     |      |             |             |             |              |
|---------------------|------|-------------|-------------|-------------|--------------|
| Methyl octylate     | 1397 | n. d.       | n. d.       | 5.76±0.12a  | n. d.        |
| Ethyl caprylate     | 1436 | 32.03±1.05a | 6.76±0.16c  | 11.46±0.43b | 2.41±0.05d   |
| Methyl benzoate     | 1616 | n. d.       | n. d.       | n. d.       | 0.63±0.02a   |
| Methyl-4-decenoate  | 1620 | 3.75±0.10a  | n. d.       | 3.67±0.09a  | n. d.        |
| Ethyl caprate       | 1630 | n. d.       | 2.43±0.07a  | 0.88±0.02b  | 0.80±0.01b   |
| 3-Hexenylbutyrate   | 1647 | n. d.       | n. d.       | n. d.       | 1.03±0.04a   |
| Ethyl benzoate      | 1658 | 3.83±0.14b  | 4.65±0.18a  | 1.70±0.06d  | 2.47±0.07c   |
| Ethyl-4-decenoate   | 1672 | 9.48±0.23a  | 0.83±0.01c  | 2.90±0.09b  | n. d.        |
| Hexyl octanoate     | 1800 | 1.16±0.04a  | n. d.       | n. d.       | n. d.        |
| Phenethyl acetate   | 1807 | 20.83±0.71d | 47.10±1.01a | 40.96±0.95b | 31.01±0.82c  |
| <b>Lactones</b>     |      |             |             |             |              |
| γ-Caprolactone      | 1709 | n. d.       | 3.44±0.09c  | 4.09±0.14b  | 8.13±0.23a   |
| γ-Heptalactone      | 1784 | 0.33±0.01a  | n. d.       | n. d.       | n. d.        |
| γ-Octalactone       | 1886 | 2.29±0.03d  | 3.67±0.10b  | 3.13±0.06c  | 4.08±0.07a   |
| δ-Octalactone       | 1967 | n. d.       | n. d.       | n. d.       | 0.28±0.01a   |
| γ-Decalactone       | 2130 | 31.58±0.79c | 30.13±0.76d | 46.97±1.13b | 61.53±1.43a  |
| δ-Decalactone       | 2193 | 5.16±0.13c  | 2.49±0.10d  | 8.16±0.26b  | 21.57±0.84a  |
| γ-Dodecalactone     | 2376 | n. d.       | 10.82±0.49a | 4.60±0.12b  | 2.15±0.08c   |
| <b>Terpenes</b>     |      |             |             |             |              |
| β-Myrcene           | 1145 | n. d.       | n. d.       | n. d.       | 2.73±0.10a   |
| Linalool            | 1537 | 95.11±1.65b | 4.3±0.15c   | n. d.       | 156.57±6.06a |
| <b>Others</b>       |      |             |             |             |              |
| Paraxylene          | 1139 | n. d.       | 1.06±0.03a  | n. d.       | n. d.        |
| 2-Pentylfuran       | 1228 | n. d.       | 2.74±0.10b  | 1.43±0.05c  | 6.25±0.20a   |
| Theaspirane         | 1523 | 7.32±0.25a  | 2.49±0.08c  | 3.41±0.09b  | 1.76±0.05d   |
| Azulene             | 1746 | n. d.       | 2.97±0.05b  | 14.91±0.6a  | 3.44±0.77b   |
| 2-Methylnaphthalene | 1852 | 1.04±0.03a  | 0.74±0.01b  | n. d.       | n. d.        |
| 15-Crown-5          | 2431 | 0.48±0.01a  | n. d.       | n. d.       | 0.33±0.01b   |

"n. d." indicates that the substance was not detected in the corresponding sample. Each value was the mean ± standard deviation. Significant variations are shown with different letters for each sample at a level of  $p \leq 0.05$ .

**Table S5. Concentration of main aroma compounds of flat peaches, nectarine, apricot and grape (µg/kg).**

| Compounds           | RI   | WP      | RN     | DB   | CS    | Average | Confidence interval |
|---------------------|------|---------|--------|------|-------|---------|---------------------|
| Hexanal             | 1081 | 30.85   | 3.98   | 2.37 | 13.32 | 66.30   | 66.30±47.78         |
| 2-Hexenal           | 1213 | 399.19  | 97.86  | 0    | 91.25 | 480.94  | 480.94±209.38       |
| Nonanal             | 1396 | 21.16   | 263.90 | 3.25 | 0     | 17.50   | 17.50±4.39          |
| Decanal             | 1510 | 8.46    | 11.15  | 1.98 | 0     | 7.04    | 7.04±2.65           |
| Benzaldehyde        | 1530 | 1472.80 | 502.47 | 1.73 | 0     | 1515.93 | 1515.93±903.40      |
| 2,4-Decadienal      | 1766 | 0.90    | 0      | 0    | 0     | 0.97    | 0.97±0.35           |
| Dihydro-β-ionone    | 1825 | 7.35    | 0.86   | 0    | 0     | 6.55    | 6.55±3.97           |
| 6-Pentylpyran-2-one | 2175 | 4.58    | 17.99  | 0    | 0     | 3.34    | 3.44±22.39          |
| 2-Hexenyl acetate   | 1337 | 28.29   | 0      | 0    | 0     | 22.27   | 22.27±6.89          |
| Ethyl caprylate     | 1630 | 2.41    | 10.57  | 0    | 3.78  | 13.17   | 13.17±13.11         |
| γ-Decalactone       | 2130 | 61.53   | 176.52 | 0    | 0     | 42.55   | 42.55±14.77         |
| Theaspirane         | 1523 | 1.76    | 0      | 0    | 0     | 3.75    | 3.75±2.48           |

Data from the same laboratory, adapted from Huimin Wu et al. (2022) [77], Cai Zhao et al. (2022) [78] and Yuanyuan Miao et al. (2022) [79]. The confidence interval and average values of 12 volatile compound concentrations in the 4 flat peaches from Xinjiang, including Qingpan (QP), Wanpan (WP), Ruipan 2 (R2) and Ruipan 4 (R4). Nectarine (*Prunus nucipersica* L.), yellow nectarine (YN); apricot (*Prunus armeniaca* L.), Dabaiyou (DBY); grape (*Vitis vinifera* L.), Cabernet Sauvignon (CS).

## Supplementary Figures

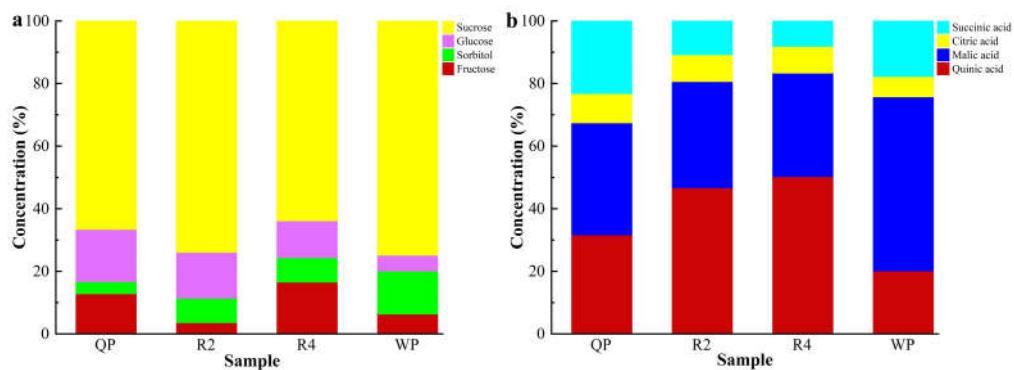

Figure S1. The concentration of soluble sugars and organic acids of flat peach in Xinjiang.

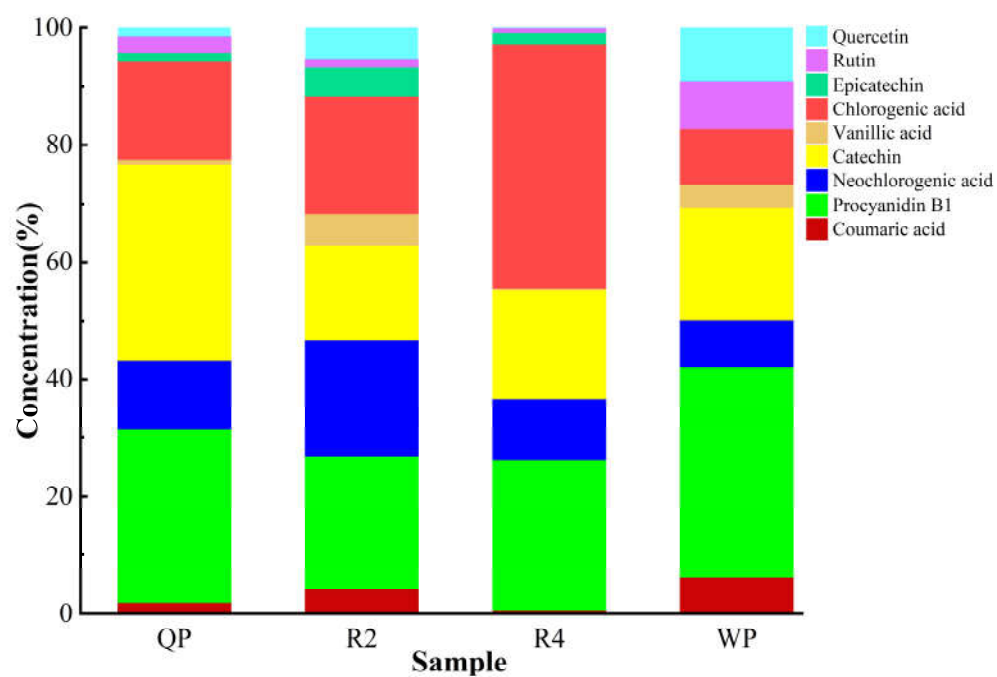

Figure S2. The concentration of phenolic compounds of flat peach in Xinjiang.



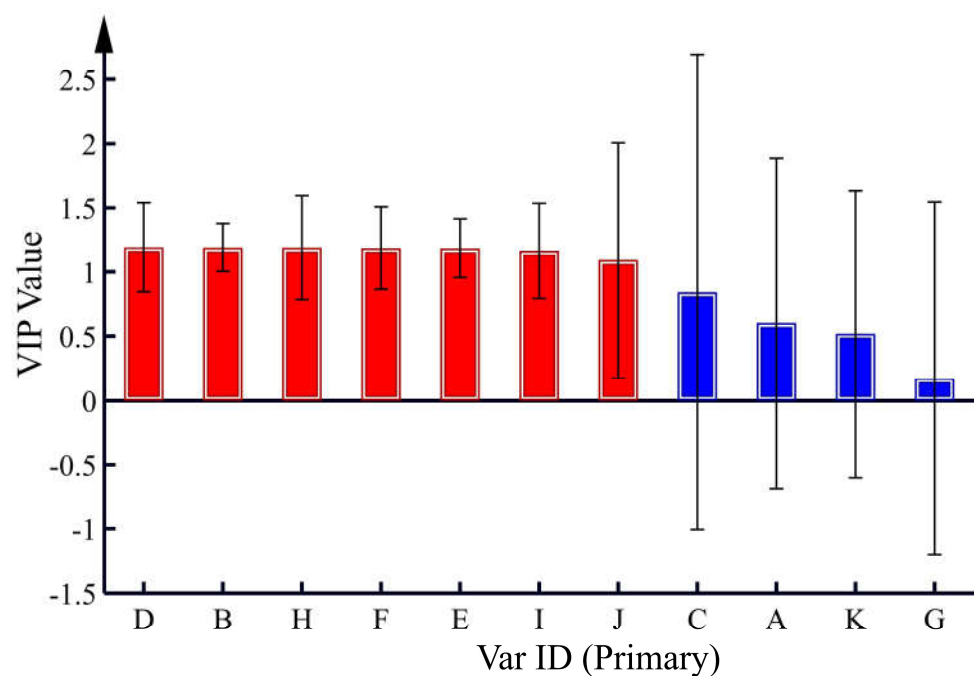

A: Total flavonoids      E: Neochlorogenic acid      I: Epicatechin  
 B: Total phenols      F: Catechin      J: Rutin  
 C: Coumaric acid      G: Vanillic acid      K: Quercetin  
 D: Proanthocyanidin B1      H: Chlorogenic acid

**Figure S3. Importance of variables between phenolic compounds and antioxidant activity of flat peach in Xinjiang.** Red means VIP more than 1, blue means VIP less than 1. The variable importance (VIP) value represents relevance.

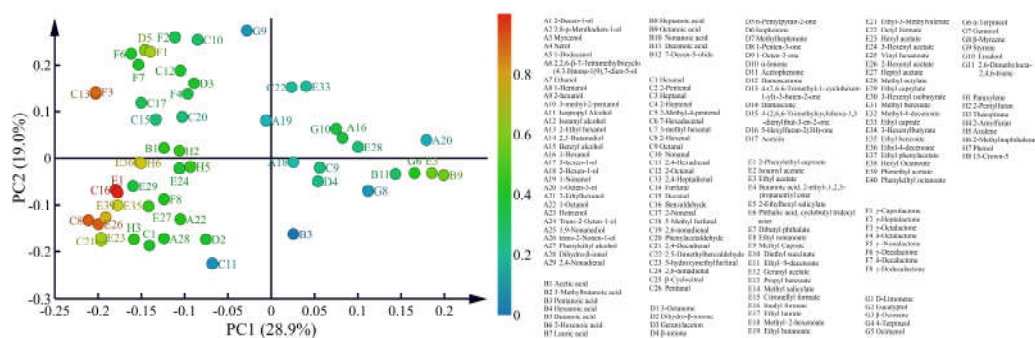

Figure S4. The loading diagram of PCA of volatile compounds of flat peach in Xinjiang.

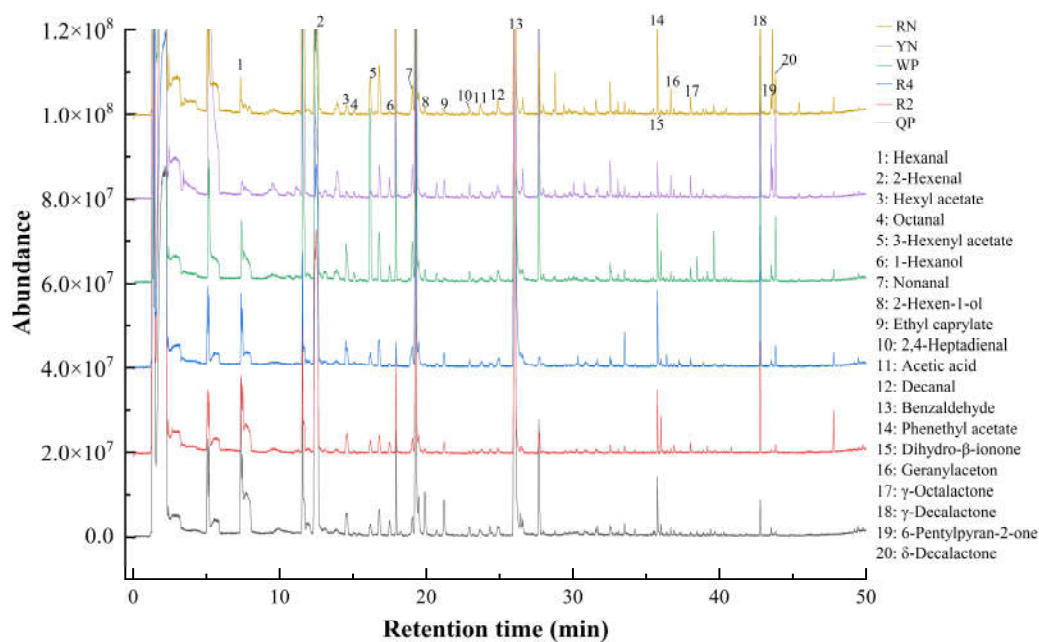

**Figure S5. Overlay of the common ion chromatograms in the HS-SPME-GC-MS analysis of flat peaches and nectarines.** Flat peaches, including Qingpan (QP), Wanpan (WP), Ruipan 2 (R2) and Ruipan 4 (R4); nectarines (*Prunus nucipersica* L.), including yellow nectarine (YN) and red nectarine (RN). The data of nectarines from the same laboratory, adapted from Huimin Wu et al. (2022).

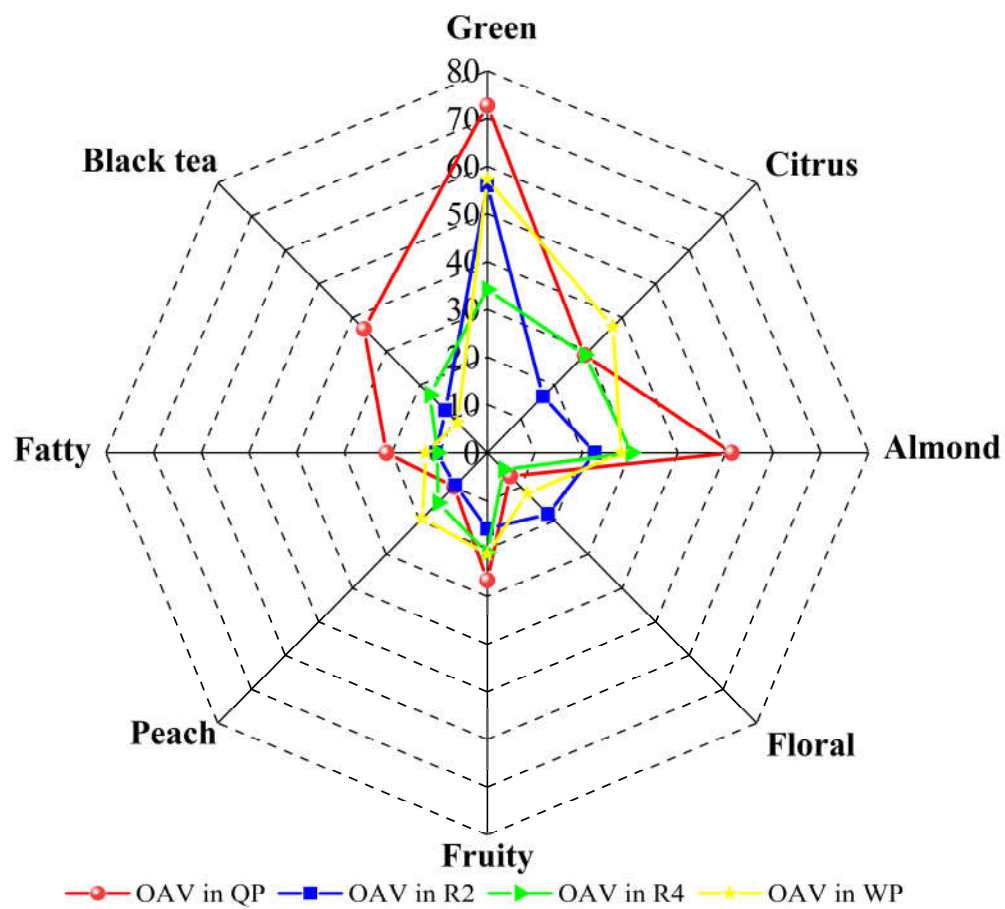

Figure S6. Odor characteristics of main aroma substances of flat peach in Xinjiang.
